# Supplementary material
Source: Springer Nature journal article supplement (https://www.springermedizin.de/resource/supplementary/12987_2012_59_MOESM6_ESM.pdf/9680254)

**WT mice**

**Abcg2-KO mice**

**2<sup>nd</sup> antibody  
alone**

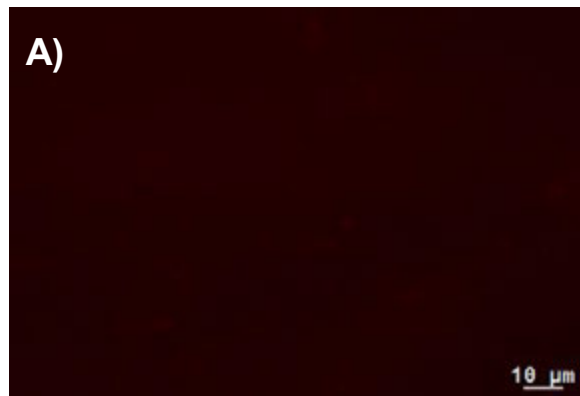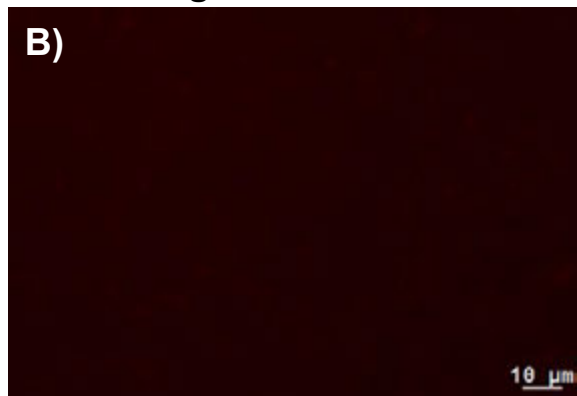

**A $\beta$  antibody  
(6E10)**

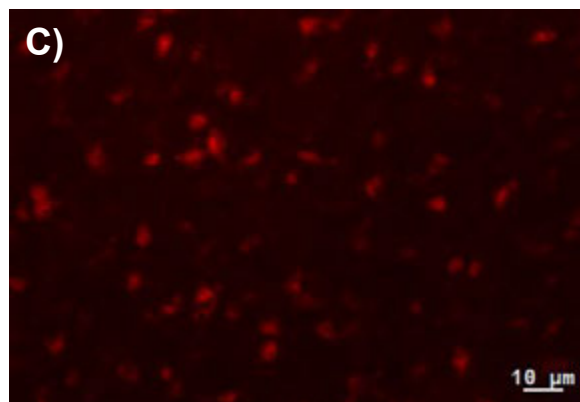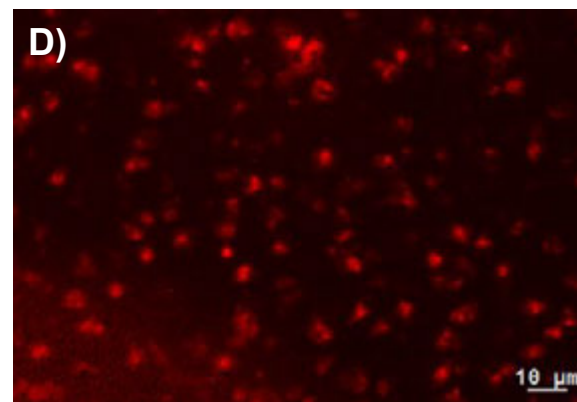

**Overlay A $\beta$   
with UEA-I**

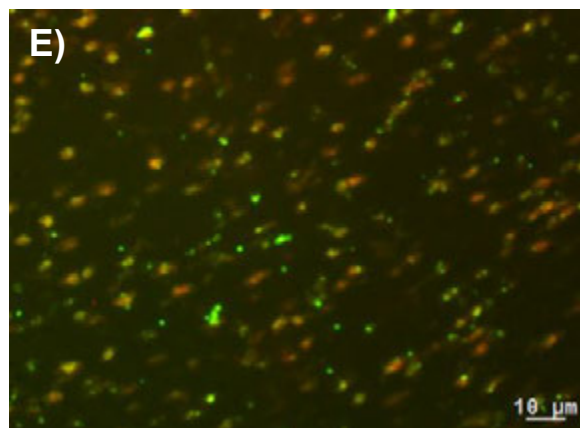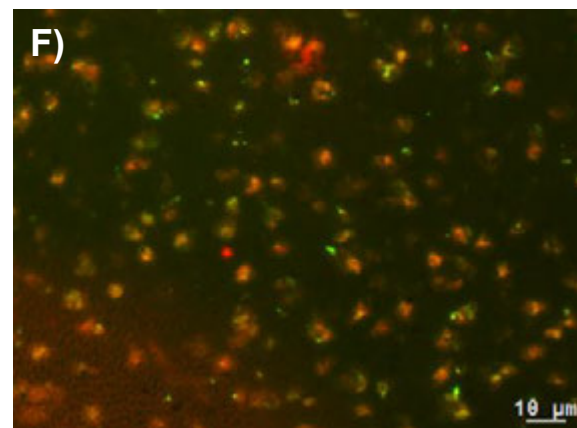

Supplement: MOESM6 [file 9680254]
